# Supplementary material for: Accuracies of field CO 2 −H 2 O data from open-path eddy-covariance flux systems: Assessment based on atmospheric physics and biological environment
Source: Copernicus journal article supplement (doi:10.5194/gi-2022-1), 2022-01-26
Supplement: Supplementary file 7 [file Data_Fig5_Zhou_et_al.xlsx]

## Sheet: Tc_20
P=101.325 kPa	101.325	Tc= 20
		RH=100%
Air temperature	rho_s	rho_s	rho_s	f( P)	Sigma_H2O	s_H2O	d_wz	delt_H2O	delt_rho	Zro_err_H2O	Gain_err_H2O	Gain/zro	Gain/delt_rho	zero/delta_rho
	gH2O m-3	gH2O m-3	gH2O m-3		gH2O m-3	gH2O m-3 (mgCO2 m-3)-1	gH2O m-3	fraction	gH2O m-3	gH2O m-3	gH2O m-3	%	%	%
-30	0.340464	0.340464	0.340464	1.00472	0.004	4.09e-05	0.04	0.003	0.0659121	0.025	0.000638371	2.55348	0.968518	37.9293
-29	0.376079	0.376079	0.376079	1.00472	0.004	4.09e-05	0.04	0.003	0.0654647	0.0245	0.000691045	2.82059	1.0556	37.4247
-28	0.415074	0.415074	0.415074	1.00472	0.004	4.09e-05	0.04	0.003	0.0650208	0.024	0.000747133	3.11305	1.14907	36.9112
-27	0.457737	0.457737	0.457737	1.00472	0.004	4.09e-05	0.04	0.003	0.0645805	0.0235	0.000806761	3.43303	1.24923	36.3887
-26	0.504376	0.504376	0.504376	1.00472	0.004	4.09e-05	0.04	0.003	0.0641437	0.023	0.000870049	3.78282	1.3564	35.857
-25	0.555323	0.555323	0.555323	1.00472	0.004	4.09e-05	0.04	0.003	0.0637108	0.0225	0.000937108	4.16492	1.47088	35.3158
-24	0.610933	0.610933	0.610933	1.00472	0.004	4.09e-05	0.04	0.003	0.0632817	0.022	0.00100804	4.582	1.59294	34.7652
-23	0.671588	0.671588	0.671588	1.00472	0.004	4.09e-05	0.04	0.003	0.0628566	0.0215	0.00108294	5.03691	1.72287	34.2048
-22	0.737695	0.737695	0.737695	1.00472	0.004	4.09e-05	0.04	0.003	0.0624356	0.021	0.00116187	5.53271	1.86091	33.6347
-21	0.809692	0.809692	0.809692	1.00472	0.004	4.09e-05	0.04	0.003	0.0620186	0.0205	0.0012449	6.07269	2.0073	33.0546
-20	0.888047	0.888047	0.888047	1.00472	0.004	4.09e-05	0.04	0.003	0.0616058	0.02	0.00133207	6.66035	2.16225	32.4645
-19	0.973259	0.973259	0.973259	1.00472	0.004	4.09e-05	0.04	0.003	0.0611971	0.0195	0.00142339	7.29944	2.32591	31.8643
-18	1.06586	1.06586	1.06586	1.00472	0.004	4.09e-05	0.04	0.003	0.0607926	0.019	0.00151886	7.99399	2.49843	31.2538
-17	1.16643	1.16643	1.16643	1.00472	0.004	4.09e-05	0.04	0.003	0.0603921	0.0185	0.00161843	8.74825	2.67986	30.6331
-16	1.27558	1.27558	1.27558	1.00472	0.004	4.09e-05	0.04	0.003	0.0599957	0.018	0.00172203	9.56682	2.87025	30.0021
-15	1.39394	1.39394	1.39394	1.00472	0.004	4.09e-05	0.04	0.003	0.0596032	0.0175	0.00182955	10.4546	3.06954	29.3608
-14	1.52222	1.52222	1.52222	1.00472	0.004	4.09e-05	0.04	0.003	0.0592145	0.017	0.00194083	11.4167	3.27763	28.7092
-13	1.66116	1.66116	1.66116	1.00472	0.004	4.09e-05	0.04	0.003	0.0588294	0.0165	0.00205568	12.4587	3.49431	28.0472
-12	1.81153	1.81153	1.81153	1.00472	0.004	4.09e-05	0.04	0.003	0.0584475	0.016	0.00217384	13.5865	3.71929	27.375
-11	1.97418	1.97418	1.97418	1.00472	0.004	4.09e-05	0.04	0.003	0.0580687	0.0155	0.00229498	14.8063	3.95219	26.6925
-10	2.14999	2.14999	2.14999	1.00472	0.004	4.09e-05	0.04	0.003	0.0576924	0.015	0.00241874	16.1249	4.19247	25.9999
-9	2.33991	2.33991	2.33991	1.00472	0.004	4.09e-05	0.04	0.003	0.0573184	0.0145	0.00254465	17.5493	4.43951	25.2973
-8	2.54494	2.54494	2.54494	1.00472	0.004	4.09e-05	0.04	0.003	0.0569459	0.014	0.00267219	19.0871	4.69251	24.5847
-7	2.76615	2.76615	2.76615	1.00472	0.004	4.09e-05	0.04	0.003	0.0565744	0.0135	0.00280073	20.7461	4.95052	23.8624
-6	3.00467	3.00467	3.00467	1.00472	0.004	4.09e-05	0.04	0.003	0.0562033	0.013	0.00292955	22.535	5.21242	23.1303
-5	3.26169	3.26169	3.26169	1.00472	0.004	4.09e-05	0.04	0.003	0.0558315	0.0125	0.00305783	24.4627	5.47689	22.3888
-4	3.53848	3.53848	3.53848	1.00472	0.004	4.09e-05	0.04	0.003	0.0554583	0.012	0.00318463	26.5386	5.74239	21.6379
-3	3.83639	3.83639	3.83639	1.00472	0.004	4.09e-05	0.04	0.003	0.0550826	0.0115	0.00330888	28.7729	6.00713	20.8777
-2	4.15684	4.15684	4.15684	1.00472	0.004	4.09e-05	0.04	0.003	0.0547031	0.011	0.00342939	31.1763	6.2691	20.1086
-1	4.50133	4.50133	4.50133	1.00472	0.004	4.09e-05	0.04	0.003	0.0543185	0.0105	0.0035448	33.76	6.52595	19.3304
0	4.87147	4.87147	4.87147	1.00472	0.004	4.09e-05	0.04	0.003	0.0539273	0.01	0.0036536	36.536	6.77505	18.5435
1	5.21698	5.21698	5.21698	1.00472	0.004	4.09e-05	0.04	0.003	0.0534908	0.0095	0.0037171	39.1273	6.94904	17.7601
2	5.58378	5.58378	5.58378	1.00472	0.004	4.09e-05	0.04	0.003	0.0530428	0.009	0.00376905	41.8783	7.10569	16.9674
3	5.97297	5.97297	5.97297	1.00472	0.004	4.09e-05	0.04	0.003	0.0525815	0.0085	0.00380777	44.7973	7.24166	16.1654
4	6.38571	6.38571	6.38571	1.00472	0.004	4.09e-05	0.04	0.003	0.0521051	0.008	0.00383143	47.8928	7.35326	15.3536
5	6.82318	6.82318	6.82318	1.00472	0.004	4.09e-05	0.04	0.003	0.0516117	0.0075	0.00383804	51.1738	7.43637	14.5316
6	7.28662	7.28662	7.28662	1.00472	0.004	4.09e-05	0.04	0.003		0.007	0.00382548	17.9512	3.91259	27.1786
7	7.77734	7.77734	7.77734	1.00472	0.004	4.09e-05	0.04	0.003		0.0065	0.00379145
8	8.29666	8.29666	8.29666	1.00472	0.004	4.09e-05	0.04	0.003		0.006	0.0037335
9	8.84598	8.84598	8.84598	1.00472	0.004	4.09e-05	0.04	0.003		0.0055	0.00364897
10	9.42675	9.42675	9.42675	1.00472	0.004	4.09e-05	0.04	0.003		0.005	0.00353503
11	10.0405	10.0405	10.0405	1.00472	0.004	4.09e-05	0.04	0.003		0.0045	0.00338866
12	10.6887	10.6887	10.6887	1.00472	0.004	4.09e-05	0.04	0.003		0.004	0.00320661
13	11.373	11.373	11.373	1.00472	0.004	4.09e-05	0.04	0.003		0.0035	0.00298542
14	12.0952	12.0952	12.0952	1.00472	0.004	4.09e-05	0.04	0.003		0.003	0.00272142
15	12.8569	12.8569	12.8569	1.00472	0.004	4.09e-05	0.04	0.003		0.0025	0.00241066
16	13.6598	13.6598	13.6598	1.00472	0.004	4.09e-05	0.04	0.003		0.002	0.00204898
17	14.506	14.506	14.506	1.00472	0.004	4.09e-05	0.04	0.003		0.0015	0.00163193
18	15.3973	15.3973	15.3973	1.00472	0.004	4.09e-05	0.04	0.003		0.001	0.0011548
19	16.3356	16.3356	16.3356	1.00472	0.004	4.09e-05	0.04	0.003		0.0005	0.000612587
20	17.3232	17.3232	17.3232	1.00472	0.004	4.09e-05	0.04	0.003		0	0
21	18.3619	18.3619	18.3619	1.00472	0.004	4.09e-05	0.04	0.003		0.0005	0.000688573
22	19.4542	19.4542	19.4542	1.00472	0.004	4.09e-05	0.04	0.003		0.001	0.00145906
23	20.6022	20.6022	20.6022	1.00472	0.004	4.09e-05	0.04	0.003		0.0015	0.00231774
24	21.8082	21.8082	21.8082	1.00472	0.004	4.09e-05	0.04	0.003		0.002	0.00327123
25	23.0748	23.0748	23.0748	1.00472	0.004	4.09e-05	0.04	0.003		0.0025	0.00432652
26	24.4043	24.4043	24.4043	1.00472	0.004	4.09e-05	0.04	0.003		0.003	0.00549097
27	25.7994	25.7994	25.7994	1.00472	0.004	4.09e-05	0.04	0.003		0.0035	0.00677234
28	27.2627	27.2627	27.2627	1.00472	0.004	4.09e-05	0.04	0.003		0.004	0.0081788
29	28.7969	28.7969	28.7969	1.00472	0.004	4.09e-05	0.04	0.003		0.0045	0.00971894
30	30.4048	30.4048	30.4048	1.00472	0.004	4.09e-05	0.04	0.003		0.005	0.0114018
31	32.0894	32.0894	32.0894	1.00472	0.004	4.09e-05	0.04	0.003		0.0055	0.0132369
32	33.8536	33.8536	33.8536	1.00472	0.004	4.09e-05	0.04	0.003		0.006	0.0152341
33	35.7005	35.7005	35.7005	1.00472	0.004	4.09e-05	0.04	0.003		0.0065	0.017404
34	37.6332	37.6332	37.6332	1.00472	0.004	4.09e-05	0.04	0.003		0.007	0.0197574
35	39.655	39.655	39.655	1.00472	0.004	4.09e-05	0.04	0.003		0.0075	0.0223059
36	41.7692	41.7692	41.7692	1.00472	0.004	4.09e-05	0.04	0.003		0.008	0.0250615
37	43.9793	43.9793	43.9793	1.00472	0.004	4.09e-05	0.04	0.003		0.0085	0.0280368
37.1	44.2057	44.2057	44	1.00472	0.004	4.09e-05	0.04	0.003		0.00855	0.028215
37.2	44.4331	44.4331	44	1.00472	0.004	4.09e-05	0.04	0.003		0.0086	0.02838
37.3	44.6616	44.6616	44	1.00472	0.004	4.09e-05	0.04	0.003		0.00865	0.028545
37.4	44.891	44.891	44	1.00472	0.004	4.09e-05	0.04	0.003		0.0087	0.02871
37.5	45.1214	45.1214	44	1.00472	0.004	4.09e-05	0.04	0.003		0.00875	0.028875
37.6	45.3528	45.3528	44	1.00472	0.004	4.09e-05	0.04	0.003		0.0088	0.02904
37.7	45.5853	45.5853	44	1.00472	0.004	4.09e-05	0.04	0.003		0.00885	0.029205
37.8	45.8188	45.8188	44	1.00472	0.004	4.09e-05	0.04	0.003		0.0089	0.02937
37.9	46.0533	46.0533	44	1.00472	0.004	4.09e-05	0.04	0.003		0.00895	0.029535
38	46.2888	46.2888	44	1.00472	0.004	4.09e-05	0.04	0.003		0.009	0.0297
38.1	46.5253	46.5253	44	1.00472	0.004	4.09e-05	0.04	0.003		0.00905	0.029865
38.2	46.7629	46.7629	44	1.00472	0.004	4.09e-05	0.04	0.003		0.0091	0.03003
38.3	47.0015	47.0015	44	1.00472	0.004	4.09e-05	0.04	0.003		0.00915	0.030195
38.4	47.2412	47.2412	44	1.00472	0.004	4.09e-05	0.04	0.003		0.0092	0.03036
38.5	47.4819	47.4819	44	1.00472	0.004	4.09e-05	0.04	0.003		0.00925	0.030525
38.6	47.7236	47.7236	44	1.00472	0.004	4.09e-05	0.04	0.003		0.0093	0.03069
38.7	47.9665	47.9665	44	1.00472	0.004	4.09e-05	0.04	0.003		0.00935	0.030855
38.8	48.2103	48.2103	44	1.00472	0.004	4.09e-05	0.04	0.003		0.0094	0.03102
38.9	48.4552	48.4552	44	1.00472	0.004	4.09e-05	0.04	0.003		0.00945	0.031185
39	48.7012	48.7012	44	1.00472	0.004	4.09e-05	0.04	0.003		0.0095	0.03135
39.1	48.9483	48.9483	44	1.00472	0.004	4.09e-05	0.04	0.003		0.00955	0.031515
39.2	49.1964	49.1964	44	1.00472	0.004	4.09e-05	0.04	0.003		0.0096	0.03168
39.3	49.4456	49.4456	44	1.00472	0.004	4.09e-05	0.04	0.003		0.00965	0.031845
39.4	49.6959	49.6959	44	1.00472	0.004	4.09e-05	0.04	0.003		0.0097	0.03201
39.5	49.9472	49.9472	44	1.00472	0.004	4.09e-05	0.04	0.003		0.00975	0.032175
39.6	50.1997	50.1997	44	1.00472	0.004	4.09e-05	0.04	0.003		0.0098	0.03234
39.7	50.4532	50.4532	44	1.00472	0.004	4.09e-05	0.04	0.003		0.00985	0.032505
39.8	50.7078	50.7078	44	1.00472	0.004	4.09e-05	0.04	0.003		0.0099	0.03267
39.9	50.9635	50.9635	44	1.00472	0.004	4.09e-05	0.04	0.003		0.00995	0.032835
40	51.2204	51.2204	44	1.00472	0.004	4.09e-05	0.04	0.003		0.01	0.033
40.1	51.4783	51.4783	44	1.00472	0.004	4.09e-05	0.04	0.003		0.01005	0.033165
40.2	51.7373	51.7373	44	1.00472	0.004	4.09e-05	0.04	0.003		0.0101	0.03333
40.3	51.9975	51.9975	44	1.00472	0.004	4.09e-05	0.04	0.003		0.01015	0.033495
40.4	52.2588	52.2588	44	1.00472	0.004	4.09e-05	0.04	0.003		0.0102	0.03366
40.5	52.5212	52.5212	44	1.00472	0.004	4.09e-05	0.04	0.003		0.01025	0.033825
40.6	52.7847	52.7847	44	1.00472	0.004	4.09e-05	0.04	0.003		0.0103	0.03399
40.7	53.0493	53.0493	44	1.00472	0.004	4.09e-05	0.04	0.003		0.01035	0.034155
40.8	53.3151	53.3151	44	1.00472	0.004	4.09e-05	0.04	0.003		0.0104	0.03432
40.9	53.582	53.582	44	1.00472	0.004	4.09e-05	0.04	0.003		0.01045	0.034485
41	53.8501	53.8501	44	1.00472	0.004	4.09e-05	0.04	0.003		0.0105	0.03465
41.1	54.1192	54.1192	44	1.00472	0.004	4.09e-05	0.04	0.003		0.01055	0.034815
41.2	54.3896	54.3896	44	1.00472	0.004	4.09e-05	0.04	0.003		0.0106	0.03498
41.3	54.6611	54.6611	44	1.00472	0.004	4.09e-05	0.04	0.003		0.01065	0.035145
41.4	54.9337	54.9337	44	1.00472	0.004	4.09e-05	0.04	0.003		0.0107	0.03531
41.5	55.2076	55.2076	44	1.00472	0.004	4.09e-05	0.04	0.003		0.01075	0.035475
41.6	55.4825	55.4825	44	1.00472	0.004	4.09e-05	0.04	0.003		0.0108	0.03564
41.7	55.7587	55.7587	44	1.00472	0.004	4.09e-05	0.04	0.003		0.01085	0.035805
41.8	56.036	56.036	44	1.00472	0.004	4.09e-05	0.04	0.003		0.0109	0.03597
41.9	56.3145	56.3145	44	1.00472	0.004	4.09e-05	0.04	0.003		0.01095	0.036135
42	56.5942	56.5942	44	1.00472	0.004	4.09e-05	0.04	0.003		0.011	0.0363
42.1	56.875	56.875	44	1.00472	0.004	4.09e-05	0.04	0.003		0.01105	0.036465
42.2	57.1571	57.1571	44	1.00472	0.004	4.09e-05	0.04	0.003		0.0111	0.03663
42.3	57.4403	57.4403	44	1.00472	0.004	4.09e-05	0.04	0.003		0.01115	0.036795
42.4	57.7248	57.7248	44	1.00472	0.004	4.09e-05	0.04	0.003		0.0112	0.03696
42.5	58.0104	58.0104	44	1.00472	0.004	4.09e-05	0.04	0.003		0.01125	0.037125
42.6	58.2972	58.2972	44	1.00472	0.004	4.09e-05	0.04	0.003		0.0113	0.03729
42.7	58.5853	58.5853	44	1.00472	0.004	4.09e-05	0.04	0.003		0.01135	0.037455
42.8	58.8745	58.8745	44	1.00472	0.004	4.09e-05	0.04	0.003		0.0114	0.03762
42.9	59.165	59.165	44	1.00472	0.004	4.09e-05	0.04	0.003		0.01145	0.037785
43	59.4567	59.4567	44	1.00472	0.004	4.09e-05	0.04	0.003		0.0115	0.03795
43.1	59.7497	59.7497	44	1.00472	0.004	4.09e-05	0.04	0.003		0.01155	0.038115
43.2	60.0438	60.0438	44	1.00472	0.004	4.09e-05	0.04	0.003		0.0116	0.03828
43.3	60.3392	60.3392	44	1.00472	0.004	4.09e-05	0.04	0.003		0.01165	0.038445
43.4	60.6358	60.6358	44	1.00472	0.004	4.09e-05	0.04	0.003		0.0117	0.03861
43.5	60.9337	60.9337	44	1.00472	0.004	4.09e-05	0.04	0.003		0.01175	0.038775
43.6	61.2328	61.2328	44	1.00472	0.004	4.09e-05	0.04	0.003		0.0118	0.03894
43.7	61.5332	61.5332	44	1.00472	0.004	4.09e-05	0.04	0.003		0.01185	0.039105
43.8	61.8348	61.8348	44	1.00472	0.004	4.09e-05	0.04	0.003		0.0119	0.03927
43.9	62.1377	62.1377	44	1.00472	0.004	4.09e-05	0.04	0.003		0.01195	0.039435
44	62.4419	62.4419	44	1.00472	0.004	4.09e-05	0.04	0.003		0.012	0.0396
44.1	62.7473	62.7473	44	1.00472	0.004	4.09e-05	0.04	0.003		0.01205	0.039765
44.2	63.054	63.054	44	1.00472	0.004	4.09e-05	0.04	0.003		0.0121	0.03993
44.3	63.3619	63.3619	44	1.00472	0.004	4.09e-05	0.04	0.003		0.01215	0.040095
44.4	63.6712	63.6712	44	1.00472	0.004	4.09e-05	0.04	0.003		0.0122	0.04026
44.5	63.9817	63.9817	44	1.00472	0.004	4.09e-05	0.04	0.003		0.01225	0.040425
44.6	64.2935	64.2935	44	1.00472	0.004	4.09e-05	0.04	0.003		0.0123	0.04059
44.7	64.6067	64.6067	44	1.00472	0.004	4.09e-05	0.04	0.003		0.01235	0.040755
44.8	64.9211	64.9211	44	1.00472	0.004	4.09e-05	0.04	0.003		0.0124	0.04092
44.9	65.2368	65.2368	44	1.00472	0.004	4.09e-05	0.04	0.003		0.01245	0.041085
45	65.5538	65.5538	44	1.00472	0.004	4.09e-05	0.04	0.003		0.0125	0.04125
45.1	65.8721	65.8721	44	1.00472	0.004	4.09e-05	0.04	0.003		0.01255	0.041415
45.2	66.1918	66.1918	44	1.00472	0.004	4.09e-05	0.04	0.003		0.0126	0.04158
45.3	66.5128	66.5128	44	1.00472	0.004	4.09e-05	0.04	0.003		0.01265	0.041745
45.4	66.835	66.835	44	1.00472	0.004	4.09e-05	0.04	0.003		0.0127	0.04191
45.5	67.1587	67.1587	44	1.00472	0.004	4.09e-05	0.04	0.003		0.01275	0.042075
45.6	67.4836	67.4836	44	1.00472	0.004	4.09e-05	0.04	0.003		0.0128	0.04224
45.7	67.8099	67.8099	44	1.00472	0.004	4.09e-05	0.04	0.003		0.01285	0.042405
45.8	68.1375	68.1375	44	1.00472	0.004	4.09e-05	0.04	0.003		0.0129	0.04257
45.9	68.4665	68.4665	44	1.00472	0.004	4.09e-05	0.04	0.003		0.01295	0.042735
46	68.7969	68.7969	44	1.00472	0.004	4.09e-05	0.04	0.003		0.013	0.0429
46.1	69.1285	69.1285	44	1.00472	0.004	4.09e-05	0.04	0.003		0.01305	0.043065
46.2	69.4616	69.4616	44	1.00472	0.004	4.09e-05	0.04	0.003		0.0131	0.04323
46.3	69.796	69.796	44	1.00472	0.004	4.09e-05	0.04	0.003		0.01315	0.043395
46.4	70.1318	70.1318	44	1.00472	0.004	4.09e-05	0.04	0.003		0.0132	0.04356
46.5	70.4689	70.4689	44	1.00472	0.004	4.09e-05	0.04	0.003		0.01325	0.043725
46.6	70.8075	70.8075	44	1.00472	0.004	4.09e-05	0.04	0.003		0.0133	0.04389
46.7	71.1474	71.1474	44	1.00472	0.004	4.09e-05	0.04	0.003		0.01335	0.044055
46.8	71.4887	71.4887	44	1.00472	0.004	4.09e-05	0.04	0.003		0.0134	0.04422
46.9	71.8314	71.8314	44	1.00472	0.004	4.09e-05	0.04	0.003		0.01345	0.044385
47	72.1755	72.1755	44	1.00472	0.004	4.09e-05	0.04	0.003		0.0135	0.04455
47.1	72.521	72.521	44	1.00472	0.004	4.09e-05	0.04	0.003		0.01355	0.044715
47.2	72.8679	72.8679	44	1.00472	0.004	4.09e-05	0.04	0.003		0.0136	0.04488
47.3	73.2162	73.2162	44	1.00472	0.004	4.09e-05	0.04	0.003		0.01365	0.045045
47.4	73.5659	73.5659	44	1.00472	0.004	4.09e-05	0.04	0.003		0.0137	0.04521
47.5	73.917	73.917	44	1.00472	0.004	4.09e-05	0.04	0.003		0.01375	0.045375
47.6	74.2696	74.2696	44	1.00472	0.004	4.09e-05	0.04	0.003		0.0138	0.04554
47.7	74.6236	74.6236	44	1.00472	0.004	4.09e-05	0.04	0.003		0.01385	0.045705
47.8	74.979	74.979	44	1.00472	0.004	4.09e-05	0.04	0.003		0.0139	0.04587
47.9	75.3359	75.3359	44	1.00472	0.004	4.09e-05	0.04	0.003		0.01395	0.046035
48	75.6942	75.6942	44	1.00472	0.004	4.09e-05	0.04	0.003		0.014	0.0462
48.1	76.0539	76.0539	44	1.00472	0.004	4.09e-05	0.04	0.003		0.01405	0.046365
48.2	76.4151	76.4151	44	1.00472	0.004	4.09e-05	0.04	0.003		0.0141	0.04653
48.3	76.7778	76.7778	44	1.00472	0.004	4.09e-05	0.04	0.003		0.01415	0.046695
48.4	77.1419	77.1419	44	1.00472	0.004	4.09e-05	0.04	0.003		0.0142	0.04686
48.5	77.5075	77.5075	44	1.00472	0.004	4.09e-05	0.04	0.003		0.01425	0.047025
48.6	77.8746	77.8746	44	1.00472	0.004	4.09e-05	0.04	0.003		0.0143	0.04719
48.7	78.2431	78.2431	44	1.00472	0.004	4.09e-05	0.04	0.003		0.01435	0.047355
48.8	78.6131	78.6131	44	1.00472	0.004	4.09e-05	0.04	0.003		0.0144	0.04752
48.9	78.9847	78.9847	44	1.00472	0.004	4.09e-05	0.04	0.003		0.01445	0.047685
49	79.3576	79.3576	44	1.00472	0.004	4.09e-05	0.04	0.003		0.0145	0.04785
49.1	79.7321	79.7321	44	1.00472	0.004	4.09e-05	0.04	0.003		0.01455	0.048015
49.2	80.1081	80.1081	44	1.00472	0.004	4.09e-05	0.04	0.003		0.0146	0.04818
49.3	80.4856	80.4856	44	1.00472	0.004	4.09e-05	0.04	0.003		0.01465	0.048345
49.4	80.8646	80.8646	44	1.00472	0.004	4.09e-05	0.04	0.003		0.0147	0.04851
49.5	81.2451	81.2451	44	1.00472	0.004	4.09e-05	0.04	0.003		0.01475	0.048675
49.6	81.6272	81.6272	44	1.00472	0.004	4.09e-05	0.04	0.003		0.0148	0.04884
49.7	82.0107	82.0107	44	1.00472	0.004	4.09e-05	0.04	0.003		0.01485	0.049005
49.8	82.3958	82.3958	44	1.00472	0.004	4.09e-05	0.04	0.003		0.0149	0.04917
49.9	82.7825	82.7825	44	1.00472	0.004	4.09e-05	0.04	0.003		0.01495	0.049335
50	83.1706	83.1706	44	1.00472	0.004	4.09e-05	0.04	0.003		0.015	0.0495

## Sheet: Tc_5
P=101.325 kPa	101.325	Tc= 20
		RH=100%
Air temperature	rho_s	rho_s	rho_s	f( P)	Sigma_H2O	s_H2O	d_wz	delt_H2O	delt_rho	Zro_err_H2O	Gain_err_H2O	Gain/zro	Gain/delt_rho	zero/delta_rho
	gH2O m-3	gH2O m-3	gH2O m-3		gH2O m-3	gH2O m-3 (mgCO2 m-3)-1	gH2O m-3	Fraction	gH2O m-3	gH2O m-3	gH2O m-3	%	%	%
-30	0.340464	0.340464	0.340464	1.00472	0.004	4.09e-05	0.04	0.003	0.0582718	0.01755	0.000448136	2.55348	0.769044	30.1175
-29	0.376079	0.376079	0.376079	1.00472	0.004	4.09e-05	0.04	0.003	0.0578046	0.01705	0.000480911	2.82059	0.831959	29.4959
-28	0.415074	0.415074	0.415074	1.00472	0.004	4.09e-05	0.04	0.003	0.0573389	0.01655	0.00051521	3.11305	0.898535	28.8635
-27	0.457737	0.457737	0.457737	1.00472	0.004	4.09e-05	0.04	0.003	0.0568747	0.01605	0.000551001	3.43303	0.968797	28.2199
-26	0.504376	0.504376	0.504376	1.00472	0.004	4.09e-05	0.04	0.003	0.0564119	0.01555	0.000588229	3.78282	1.04274	27.5651
-25	0.555323	0.555323	0.555323	1.00472	0.004	4.09e-05	0.04	0.003	0.0559505	0.01505	0.000626821	4.16492	1.12031	26.8988
-24	0.610933	0.610933	0.610933	1.00472	0.004	4.09e-05	0.04	0.003	0.0554904	0.01455	0.000666681	4.582	1.20144	26.2208
-23	0.671588	0.671588	0.671588	1.00472	0.004	4.09e-05	0.04	0.003	0.0550314	0.01405	0.000707686	5.03691	1.28597	25.5309
-22	0.737695	0.737695	0.737695	1.00472	0.004	4.09e-05	0.04	0.003	0.0545734	0.01355	0.000749682	5.53271	1.37371	24.829
-21	0.809692	0.809692	0.809692	1.00472	0.004	4.09e-05	0.04	0.003	0.0541162	0.01305	0.000792486	6.07269	1.46442	24.1148
-20	0.888047	0.888047	0.888047	1.00472	0.004	4.09e-05	0.04	0.003	0.0536596	0.01255	0.000835874	6.66035	1.55773	23.3882
-19	0.973259	0.973259	0.973259	1.00472	0.004	4.09e-05	0.04	0.003	0.0532033	0.01205	0.000879583	7.29944	1.65325	22.649
-18	1.06586	1.06586	1.06586	1.00472	0.004	4.09e-05	0.04	0.003	0.052747	0.01155	0.000923305	7.99399	1.75044	21.897
-17	1.16643	1.16643	1.16643	1.00472	0.004	4.09e-05	0.04	0.003	0.0522904	0.01105	0.000966682	8.74825	1.84868	21.132
-16	1.27558	1.27558	1.27558	1.00472	0.004	4.09e-05	0.04	0.003	0.051833	0.01055	0.0010093	9.56682	1.94721	20.3538
-15	1.39394	1.39394	1.39394	1.00472	0.004	4.09e-05	0.04	0.003	0.0513744	0.01005	0.00105068	10.4546	2.04515	19.5623
-14	1.52222	1.52222	1.52222	1.00472	0.004	4.09e-05	0.04	0.003	0.050914	0.00955	0.00109029	11.4167	2.14144	18.7571
-13	1.66116	1.66116	1.66116	1.00472	0.004	4.09e-05	0.04	0.003	0.0504512	0.00905	0.00112751	12.4587	2.23485	17.9381
-12	1.81153	1.81153	1.81153	1.00472	0.004	4.09e-05	0.04	0.003	0.0499853	0.00855	0.00116164	13.5865	2.32397	17.105
-11	1.97418	1.97418	1.97418	1.00472	0.004	4.09e-05	0.04	0.003	0.0495156	0.00805	0.00119191	14.8063	2.40714	16.2575
-10	2.14999	2.14999	2.14999	1.00472	0.004	4.09e-05	0.04	0.003	0.0490411	0.00755	0.00121743	16.1249	2.48247	15.3952
-9	2.33991	2.33991	2.33991	1.00472	0.004	4.09e-05	0.04	0.003	0.0485609	0.00705	0.00123723	17.5493	2.54779	14.5178
-8	2.54494	2.54494	2.54494	1.00472	0.004	4.09e-05	0.04	0.003	0.0480739	0.00655	0.0012502	19.0871	2.60059	13.6249
-7	2.76615	2.76615	2.76615	1.00472	0.004	4.09e-05	0.04	0.003	0.0475788	0.00605	0.00125514	20.7461	2.63803	12.7157
-6	3.00467	3.00467	3.00467	1.00472	0.004	4.09e-05	0.04	0.003	0.0470744	0.00555	0.00125069	22.535	2.65684	11.7898
-5	3.26169	3.26169	3.26169	1.00472	0.004	4.09e-05	0.04	0.003	0.0465591	0.00505	0.00123536	24.4627	2.65333	10.8464
-4	3.53848	3.53848	3.53848	1.00472	0.004	4.09e-05	0.04	0.003	0.0460312	0.00455	0.00120751	26.5386	2.62323	9.8846
-3	3.83639	3.83639	3.83639	1.00472	0.004	4.09e-05	0.04	0.003	0.045489	0.00405	0.0011653	28.7729	2.56172	8.90325
-2	4.15684	4.15684	4.15684	1.00472	0.004	4.09e-05	0.04	0.003	0.0449305	0.00355	0.00110676	31.1763	2.46327	7.9011
-1	4.50133	4.50133	4.50133	1.00472	0.004	4.09e-05	0.04	0.003	0.0443534	0.00305	0.00102968	33.76	2.32154	6.87659
0	4.87147	4.87147	4.87147	1.00472	0.004	4.09e-05	0.04	0.003	0.0437554	0.00255	0.000931668	36.536	2.12927	5.82786
1	5.21698	5.21698	5.21698	1.00472	0.004	4.09e-05	0.04	0.003	0.0431258	0.00205	0.00080211	39.1273	1.85993	4.75353
2	5.58378	5.58378	5.58378	1.00472	0.004	4.09e-05	0.04	0.003	0.0424728	0.00155	0.000649114	41.8783	1.52831	3.64939
3	5.97297	5.97297	5.97297	1.00472	0.004	4.09e-05	0.04	0.003	0.0417941	0.00105	0.000470372	44.7973	1.12545	2.51232
4	6.38571	6.38571	6.38571	1.00472	0.004	4.09e-05	0.04	0.003	0.0410871	0.00055	0.000263411	47.8928	0.641103	1.33862
5	6.82318	6.82318	6.82318	1.00472	0.004	4.09e-05	0.04	0.003	0.0403493	5e-05	2.55869e-05	51.1738	0.0634136	0.123918
6	7.28662	7.28662	7.28662	1.00472	0.004	4.09e-05	0.04	0.003		0.007	0.00382548	17.9512	1.7712	16.7099
7	7.77734	7.77734	7.77734	1.00472	0.004	4.09e-05	0.04	0.003		0.0065	0.00379145
8	8.29666	8.29666	8.29666	1.00472	0.004	4.09e-05	0.04	0.003		0.006	0.0037335
9	8.84598	8.84598	8.84598	1.00472	0.004	4.09e-05	0.04	0.003		0.0055	0.00364897
10	9.42675	9.42675	9.42675	1.00472	0.004	4.09e-05	0.04	0.003		0.005	0.00353503
11	10.0405	10.0405	10.0405	1.00472	0.004	4.09e-05	0.04	0.003		0.0045	0.00338866
12	10.6887	10.6887	10.6887	1.00472	0.004	4.09e-05	0.04	0.003		0.004	0.00320661
13	11.373	11.373	11.373	1.00472	0.004	4.09e-05	0.04	0.003		0.0035	0.00298542
14	12.0952	12.0952	12.0952	1.00472	0.004	4.09e-05	0.04	0.003		0.003	0.00272142
15	12.8569	12.8569	12.8569	1.00472	0.004	4.09e-05	0.04	0.003		0.0025	0.00241066
16	13.6598	13.6598	13.6598	1.00472	0.004	4.09e-05	0.04	0.003		0.002	0.00204898
17	14.506	14.506	14.506	1.00472	0.004	4.09e-05	0.04	0.003		0.0015	0.00163193
18	15.3973	15.3973	15.3973	1.00472	0.004	4.09e-05	0.04	0.003		0.001	0.0011548
19	16.3356	16.3356	16.3356	1.00472	0.004	4.09e-05	0.04	0.003		0.0005	0.000612587
20	17.3232	17.3232	17.3232	1.00472	0.004	4.09e-05	0.04	0.003		0	0
21	18.3619	18.3619	18.3619	1.00472	0.004	4.09e-05	0.04	0.003		0.0005	0.000688573
22	19.4542	19.4542	19.4542	1.00472	0.004	4.09e-05	0.04	0.003		0.001	0.00145906
23	20.6022	20.6022	20.6022	1.00472	0.004	4.09e-05	0.04	0.003		0.0015	0.00231774
24	21.8082	21.8082	21.8082	1.00472	0.004	4.09e-05	0.04	0.003		0.002	0.00327123
25	23.0748	23.0748	23.0748	1.00472	0.004	4.09e-05	0.04	0.003		0.0025	0.00432652
26	24.4043	24.4043	24.4043	1.00472	0.004	4.09e-05	0.04	0.003		0.003	0.00549097
27	25.7994	25.7994	25.7994	1.00472	0.004	4.09e-05	0.04	0.003		0.0035	0.00677234
28	27.2627	27.2627	27.2627	1.00472	0.004	4.09e-05	0.04	0.003		0.004	0.0081788
29	28.7969	28.7969	28.7969	1.00472	0.004	4.09e-05	0.04	0.003		0.0045	0.00971894
30	30.4048	30.4048	30.4048	1.00472	0.004	4.09e-05	0.04	0.003		0.005	0.0114018
31	32.0894	32.0894	32.0894	1.00472	0.004	4.09e-05	0.04	0.003		0.0055	0.0132369
32	33.8536	33.8536	33.8536	1.00472	0.004	4.09e-05	0.04	0.003		0.006	0.0152341
33	35.7005	35.7005	35.7005	1.00472	0.004	4.09e-05	0.04	0.003		0.0065	0.017404
34	37.6332	37.6332	37.6332	1.00472	0.004	4.09e-05	0.04	0.003		0.007	0.0197574
35	39.655	39.655	39.655	1.00472	0.004	4.09e-05	0.04	0.003		0.0075	0.0223059
36	41.7692	41.7692	41.7692	1.00472	0.004	4.09e-05	0.04	0.003		0.008	0.0250615
37	43.9793	43.9793	43.9793	1.00472	0.004	4.09e-05	0.04	0.003		0.0085	0.0280368
37.1	44.2057	44.2057	44	1.00472	0.004	4.09e-05	0.04	0.003		0.00855	0.028215
37.2	44.4331	44.4331	44	1.00472	0.004	4.09e-05	0.04	0.003		0.0086	0.02838
37.3	44.6616	44.6616	44	1.00472	0.004	4.09e-05	0.04	0.003		0.00865	0.028545
37.4	44.891	44.891	44	1.00472	0.004	4.09e-05	0.04	0.003		0.0087	0.02871
37.5	45.1214	45.1214	44	1.00472	0.004	4.09e-05	0.04	0.003		0.00875	0.028875
37.6	45.3528	45.3528	44	1.00472	0.004	4.09e-05	0.04	0.003		0.0088	0.02904
37.7	45.5853	45.5853	44	1.00472	0.004	4.09e-05	0.04	0.003		0.00885	0.029205
37.8	45.8188	45.8188	44	1.00472	0.004	4.09e-05	0.04	0.003		0.0089	0.02937
37.9	46.0533	46.0533	44	1.00472	0.004	4.09e-05	0.04	0.003		0.00895	0.029535
38	46.2888	46.2888	44	1.00472	0.004	4.09e-05	0.04	0.003		0.009	0.0297
38.1	46.5253	46.5253	44	1.00472	0.004	4.09e-05	0.04	0.003		0.00905	0.029865
38.2	46.7629	46.7629	44	1.00472	0.004	4.09e-05	0.04	0.003		0.0091	0.03003
38.3	47.0015	47.0015	44	1.00472	0.004	4.09e-05	0.04	0.003		0.00915	0.030195
38.4	47.2412	47.2412	44	1.00472	0.004	4.09e-05	0.04	0.003		0.0092	0.03036
38.5	47.4819	47.4819	44	1.00472	0.004	4.09e-05	0.04	0.003		0.00925	0.030525
38.6	47.7236	47.7236	44	1.00472	0.004	4.09e-05	0.04	0.003		0.0093	0.03069
38.7	47.9665	47.9665	44	1.00472	0.004	4.09e-05	0.04	0.003		0.00935	0.030855
38.8	48.2103	48.2103	44	1.00472	0.004	4.09e-05	0.04	0.003		0.0094	0.03102
38.9	48.4552	48.4552	44	1.00472	0.004	4.09e-05	0.04	0.003		0.00945	0.031185
39	48.7012	48.7012	44	1.00472	0.004	4.09e-05	0.04	0.003		0.0095	0.03135
39.1	48.9483	48.9483	44	1.00472	0.004	4.09e-05	0.04	0.003		0.00955	0.031515
39.2	49.1964	49.1964	44	1.00472	0.004	4.09e-05	0.04	0.003		0.0096	0.03168
39.3	49.4456	49.4456	44	1.00472	0.004	4.09e-05	0.04	0.003		0.00965	0.031845
39.4	49.6959	49.6959	44	1.00472	0.004	4.09e-05	0.04	0.003		0.0097	0.03201
39.5	49.9472	49.9472	44	1.00472	0.004	4.09e-05	0.04	0.003		0.00975	0.032175
39.6	50.1997	50.1997	44	1.00472	0.004	4.09e-05	0.04	0.003		0.0098	0.03234
39.7	50.4532	50.4532	44	1.00472	0.004	4.09e-05	0.04	0.003		0.00985	0.032505
39.8	50.7078	50.7078	44	1.00472	0.004	4.09e-05	0.04	0.003		0.0099	0.03267
39.9	50.9635	50.9635	44	1.00472	0.004	4.09e-05	0.04	0.003		0.00995	0.032835
40	51.2204	51.2204	44	1.00472	0.004	4.09e-05	0.04	0.003		0.01	0.033
40.1	51.4783	51.4783	44	1.00472	0.004	4.09e-05	0.04	0.003		0.01005	0.033165
40.2	51.7373	51.7373	44	1.00472	0.004	4.09e-05	0.04	0.003		0.0101	0.03333
40.3	51.9975	51.9975	44	1.00472	0.004	4.09e-05	0.04	0.003		0.01015	0.033495
40.4	52.2588	52.2588	44	1.00472	0.004	4.09e-05	0.04	0.003		0.0102	0.03366
40.5	52.5212	52.5212	44	1.00472	0.004	4.09e-05	0.04	0.003		0.01025	0.033825
40.6	52.7847	52.7847	44	1.00472	0.004	4.09e-05	0.04	0.003		0.0103	0.03399
40.7	53.0493	53.0493	44	1.00472	0.004	4.09e-05	0.04	0.003		0.01035	0.034155
40.8	53.3151	53.3151	44	1.00472	0.004	4.09e-05	0.04	0.003		0.0104	0.03432
40.9	53.582	53.582	44	1.00472	0.004	4.09e-05	0.04	0.003		0.01045	0.034485
41	53.8501	53.8501	44	1.00472	0.004	4.09e-05	0.04	0.003		0.0105	0.03465
41.1	54.1192	54.1192	44	1.00472	0.004	4.09e-05	0.04	0.003		0.01055	0.034815
41.2	54.3896	54.3896	44	1.00472	0.004	4.09e-05	0.04	0.003		0.0106	0.03498
41.3	54.6611	54.6611	44	1.00472	0.004	4.09e-05	0.04	0.003		0.01065	0.035145
41.4	54.9337	54.9337	44	1.00472	0.004	4.09e-05	0.04	0.003		0.0107	0.03531
41.5	55.2076	55.2076	44	1.00472	0.004	4.09e-05	0.04	0.003		0.01075	0.035475
41.6	55.4825	55.4825	44	1.00472	0.004	4.09e-05	0.04	0.003		0.0108	0.03564
41.7	55.7587	55.7587	44	1.00472	0.004	4.09e-05	0.04	0.003		0.01085	0.035805
41.8	56.036	56.036	44	1.00472	0.004	4.09e-05	0.04	0.003		0.0109	0.03597
41.9	56.3145	56.3145	44	1.00472	0.004	4.09e-05	0.04	0.003		0.01095	0.036135
42	56.5942	56.5942	44	1.00472	0.004	4.09e-05	0.04	0.003		0.011	0.0363
42.1	56.875	56.875	44	1.00472	0.004	4.09e-05	0.04	0.003		0.01105	0.036465
42.2	57.1571	57.1571	44	1.00472	0.004	4.09e-05	0.04	0.003		0.0111	0.03663
42.3	57.4403	57.4403	44	1.00472	0.004	4.09e-05	0.04	0.003		0.01115	0.036795
42.4	57.7248	57.7248	44	1.00472	0.004	4.09e-05	0.04	0.003		0.0112	0.03696
42.5	58.0104	58.0104	44	1.00472	0.004	4.09e-05	0.04	0.003		0.01125	0.037125
42.6	58.2972	58.2972	44	1.00472	0.004	4.09e-05	0.04	0.003		0.0113	0.03729
42.7	58.5853	58.5853	44	1.00472	0.004	4.09e-05	0.04	0.003		0.01135	0.037455
42.8	58.8745	58.8745	44	1.00472	0.004	4.09e-05	0.04	0.003		0.0114	0.03762
42.9	59.165	59.165	44	1.00472	0.004	4.09e-05	0.04	0.003		0.01145	0.037785
43	59.4567	59.4567	44	1.00472	0.004	4.09e-05	0.04	0.003		0.0115	0.03795
43.1	59.7497	59.7497	44	1.00472	0.004	4.09e-05	0.04	0.003		0.01155	0.038115
43.2	60.0438	60.0438	44	1.00472	0.004	4.09e-05	0.04	0.003		0.0116	0.03828
43.3	60.3392	60.3392	44	1.00472	0.004	4.09e-05	0.04	0.003		0.01165	0.038445
43.4	60.6358	60.6358	44	1.00472	0.004	4.09e-05	0.04	0.003		0.0117	0.03861
43.5	60.9337	60.9337	44	1.00472	0.004	4.09e-05	0.04	0.003		0.01175	0.038775
43.6	61.2328	61.2328	44	1.00472	0.004	4.09e-05	0.04	0.003		0.0118	0.03894
43.7	61.5332	61.5332	44	1.00472	0.004	4.09e-05	0.04	0.003		0.01185	0.039105
43.8	61.8348	61.8348	44	1.00472	0.004	4.09e-05	0.04	0.003		0.0119	0.03927
43.9	62.1377	62.1377	44	1.00472	0.004	4.09e-05	0.04	0.003		0.01195	0.039435
44	62.4419	62.4419	44	1.00472	0.004	4.09e-05	0.04	0.003		0.012	0.0396
44.1	62.7473	62.7473	44	1.00472	0.004	4.09e-05	0.04	0.003		0.01205	0.039765
44.2	63.054	63.054	44	1.00472	0.004	4.09e-05	0.04	0.003		0.0121	0.03993
44.3	63.3619	63.3619	44	1.00472	0.004	4.09e-05	0.04	0.003		0.01215	0.040095
44.4	63.6712	63.6712	44	1.00472	0.004	4.09e-05	0.04	0.003		0.0122	0.04026
44.5	63.9817	63.9817	44	1.00472	0.004	4.09e-05	0.04	0.003		0.01225	0.040425
44.6	64.2935	64.2935	44	1.00472	0.004	4.09e-05	0.04	0.003		0.0123	0.04059
44.7	64.6067	64.6067	44	1.00472	0.004	4.09e-05	0.04	0.003		0.01235	0.040755
44.8	64.9211	64.9211	44	1.00472	0.004	4.09e-05	0.04	0.003		0.0124	0.04092
44.9	65.2368	65.2368	44	1.00472	0.004	4.09e-05	0.04	0.003		0.01245	0.041085
45	65.5538	65.5538	44	1.00472	0.004	4.09e-05	0.04	0.003		0.0125	0.04125
45.1	65.8721	65.8721	44	1.00472	0.004	4.09e-05	0.04	0.003		0.01255	0.041415
45.2	66.1918	66.1918	44	1.00472	0.004	4.09e-05	0.04	0.003		0.0126	0.04158
45.3	66.5128	66.5128	44	1.00472	0.004	4.09e-05	0.04	0.003		0.01265	0.041745
45.4	66.835	66.835	44	1.00472	0.004	4.09e-05	0.04	0.003		0.0127	0.04191
45.5	67.1587	67.1587	44	1.00472	0.004	4.09e-05	0.04	0.003		0.01275	0.042075
45.6	67.4836	67.4836	44	1.00472	0.004	4.09e-05	0.04	0.003		0.0128	0.04224
45.7	67.8099	67.8099	44	1.00472	0.004	4.09e-05	0.04	0.003		0.01285	0.042405
45.8	68.1375	68.1375	44	1.00472	0.004	4.09e-05	0.04	0.003		0.0129	0.04257
45.9	68.4665	68.4665	44	1.00472	0.004	4.09e-05	0.04	0.003		0.01295	0.042735
46	68.7969	68.7969	44	1.00472	0.004	4.09e-05	0.04	0.003		0.013	0.0429
46.1	69.1285	69.1285	44	1.00472	0.004	4.09e-05	0.04	0.003		0.01305	0.043065
46.2	69.4616	69.4616	44	1.00472	0.004	4.09e-05	0.04	0.003		0.0131	0.04323
46.3	69.796	69.796	44	1.00472	0.004	4.09e-05	0.04	0.003		0.01315	0.043395
46.4	70.1318	70.1318	44	1.00472	0.004	4.09e-05	0.04	0.003		0.0132	0.04356
46.5	70.4689	70.4689	44	1.00472	0.004	4.09e-05	0.04	0.003		0.01325	0.043725
46.6	70.8075	70.8075	44	1.00472	0.004	4.09e-05	0.04	0.003		0.0133	0.04389
46.7	71.1474	71.1474	44	1.00472	0.004	4.09e-05	0.04	0.003		0.01335	0.044055
46.8	71.4887	71.4887	44	1.00472	0.004	4.09e-05	0.04	0.003		0.0134	0.04422
46.9	71.8314	71.8314	44	1.00472	0.004	4.09e-05	0.04	0.003		0.01345	0.044385
47	72.1755	72.1755	44	1.00472	0.004	4.09e-05	0.04	0.003		0.0135	0.04455
47.1	72.521	72.521	44	1.00472	0.004	4.09e-05	0.04	0.003		0.01355	0.044715
47.2	72.8679	72.8679	44	1.00472	0.004	4.09e-05	0.04	0.003		0.0136	0.04488
47.3	73.2162	73.2162	44	1.00472	0.004	4.09e-05	0.04	0.003		0.01365	0.045045
47.4	73.5659	73.5659	44	1.00472	0.004	4.09e-05	0.04	0.003		0.0137	0.04521
47.5	73.917	73.917	44	1.00472	0.004	4.09e-05	0.04	0.003		0.01375	0.045375
47.6	74.2696	74.2696	44	1.00472	0.004	4.09e-05	0.04	0.003		0.0138	0.04554
47.7	74.6236	74.6236	44	1.00472	0.004	4.09e-05	0.04	0.003		0.01385	0.045705
47.8	74.979	74.979	44	1.00472	0.004	4.09e-05	0.04	0.003		0.0139	0.04587
47.9	75.3359	75.3359	44	1.00472	0.004	4.09e-05	0.04	0.003		0.01395	0.046035
48	75.6942	75.6942	44	1.00472	0.004	4.09e-05	0.04	0.003		0.014	0.0462
48.1	76.0539	76.0539	44	1.00472	0.004	4.09e-05	0.04	0.003		0.01405	0.046365
48.2	76.4151	76.4151	44	1.00472	0.004	4.09e-05	0.04	0.003		0.0141	0.04653
48.3	76.7778	76.7778	44	1.00472	0.004	4.09e-05	0.04	0.003		0.01415	0.046695
48.4	77.1419	77.1419	44	1.00472	0.004	4.09e-05	0.04	0.003		0.0142	0.04686
48.5	77.5075	77.5075	44	1.00472	0.004	4.09e-05	0.04	0.003		0.01425	0.047025
48.6	77.8746	77.8746	44	1.00472	0.004	4.09e-05	0.04	0.003		0.0143	0.04719
48.7	78.2431	78.2431	44	1.00472	0.004	4.09e-05	0.04	0.003		0.01435	0.047355
48.8	78.6131	78.6131	44	1.00472	0.004	4.09e-05	0.04	0.003		0.0144	0.04752
48.9	78.9847	78.9847	44	1.00472	0.004	4.09e-05	0.04	0.003		0.01445	0.047685
49	79.3576	79.3576	44	1.00472	0.004	4.09e-05	0.04	0.003		0.0145	0.04785
49.1	79.7321	79.7321	44	1.00472	0.004	4.09e-05	0.04	0.003		0.01455	0.048015
49.2	80.1081	80.1081	44	1.00472	0.004	4.09e-05	0.04	0.003		0.0146	0.04818
49.3	80.4856	80.4856	44	1.00472	0.004	4.09e-05	0.04	0.003		0.01465	0.048345
49.4	80.8646	80.8646	44	1.00472	0.004	4.09e-05	0.04	0.003		0.0147	0.04851
49.5	81.2451	81.2451	44	1.00472	0.004	4.09e-05	0.04	0.003		0.01475	0.048675
49.6	81.6272	81.6272	44	1.00472	0.004	4.09e-05	0.04	0.003		0.0148	0.04884
49.7	82.0107	82.0107	44	1.00472	0.004	4.09e-05	0.04	0.003		0.01485	0.049005
49.8	82.3958	82.3958	44	1.00472	0.004	4.09e-05	0.04	0.003		0.0149	0.04917
49.9	82.7825	82.7825	44	1.00472	0.004	4.09e-05	0.04	0.003		0.01495	0.049335
50	83.1706	83.1706	44	1.00472	0.004	4.09e-05	0.04	0.003		0.015	0.0495
